# Supplementary material for: A New Alkamide with an Endoperoxide Structure from Acmella ciliata (Asteraceae) and Its in Vitro Antiplasmodial Activity
Source: MDPI journal article supplement (doi:10.3390/molecules21060765), 2016-06-11
Supplement: s1 [file s1]

# Supplementary Materials: A New Alkamide with An Endoperoxide Structure from *Acmella ciliata* (Asteraceae) and Its *in Vitro* Antiplasmodial Activity

Narjara Silveira, Julia Saar, Alan Diego C. Santos, Andersson Barison, Louis P. Sandjo, Reto Brun, Marcel Kaiser, Thomas J. Schmidt and Maique W. Biavatti

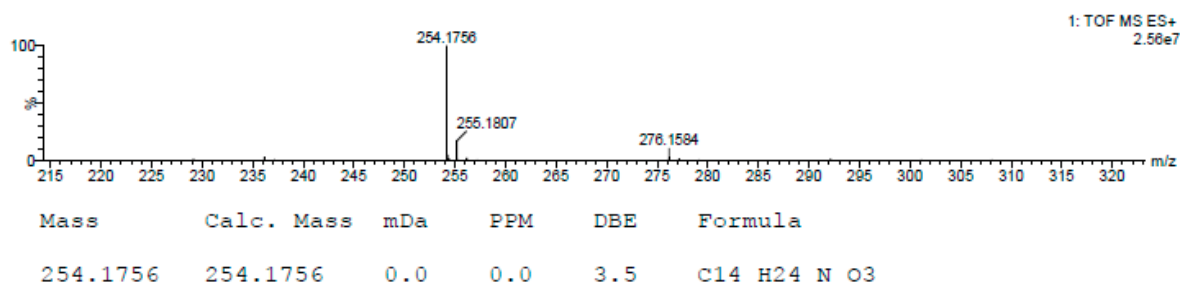

Figure S1. +ESI-QTOF mass spectrum of compound 3.

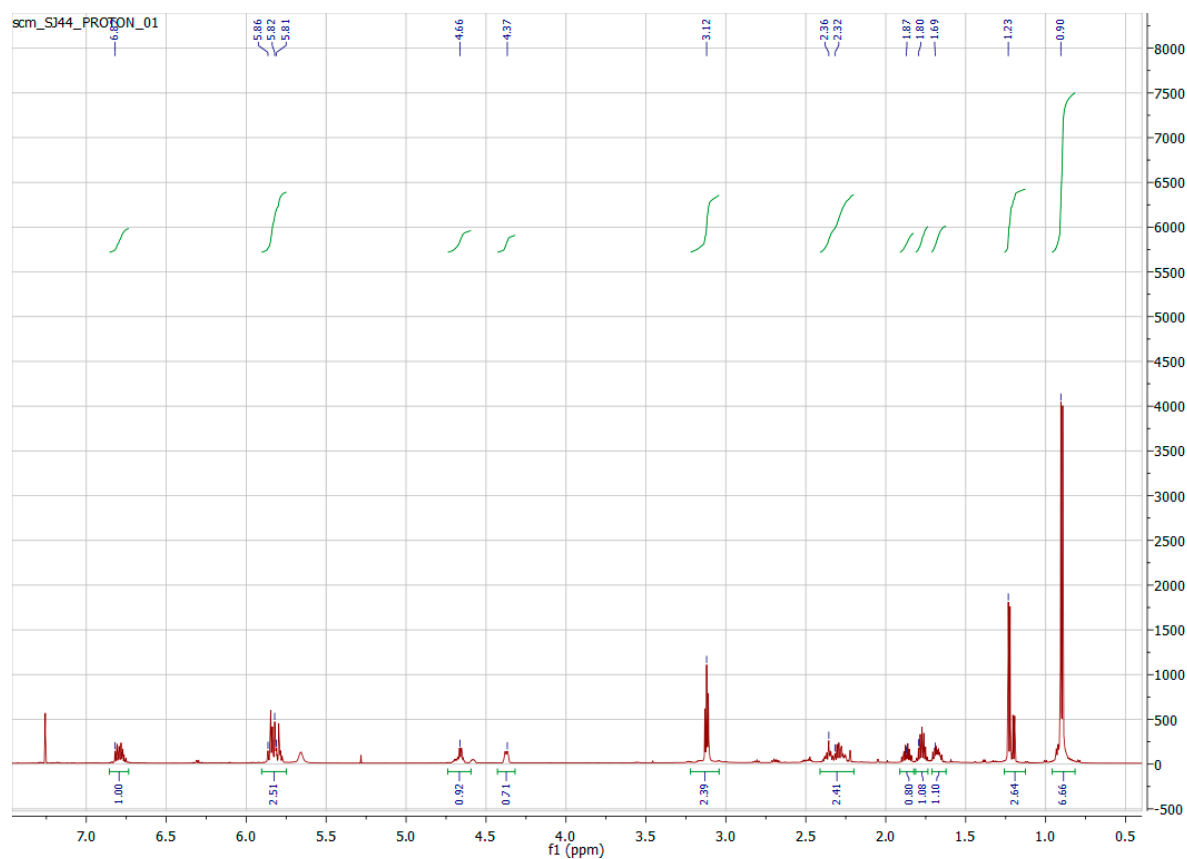

Figure S2. <sup>1</sup>H-NMR spectrum (600 MHz, CDCl<sub>3</sub>) of compound 3.

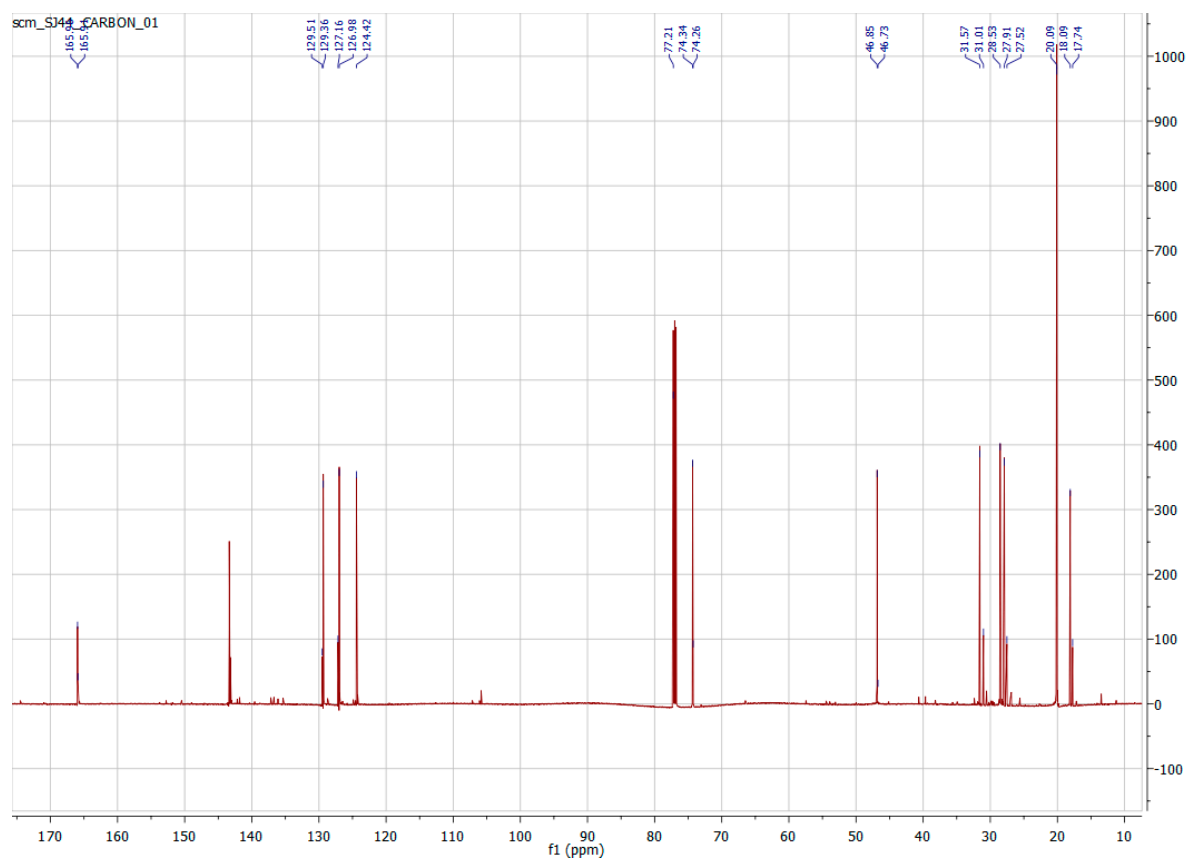

Figure S3.  $^{13}\text{C}$ -NMR spectrum (150 MHz,  $\text{CDCl}_3$ ) of compound 3.

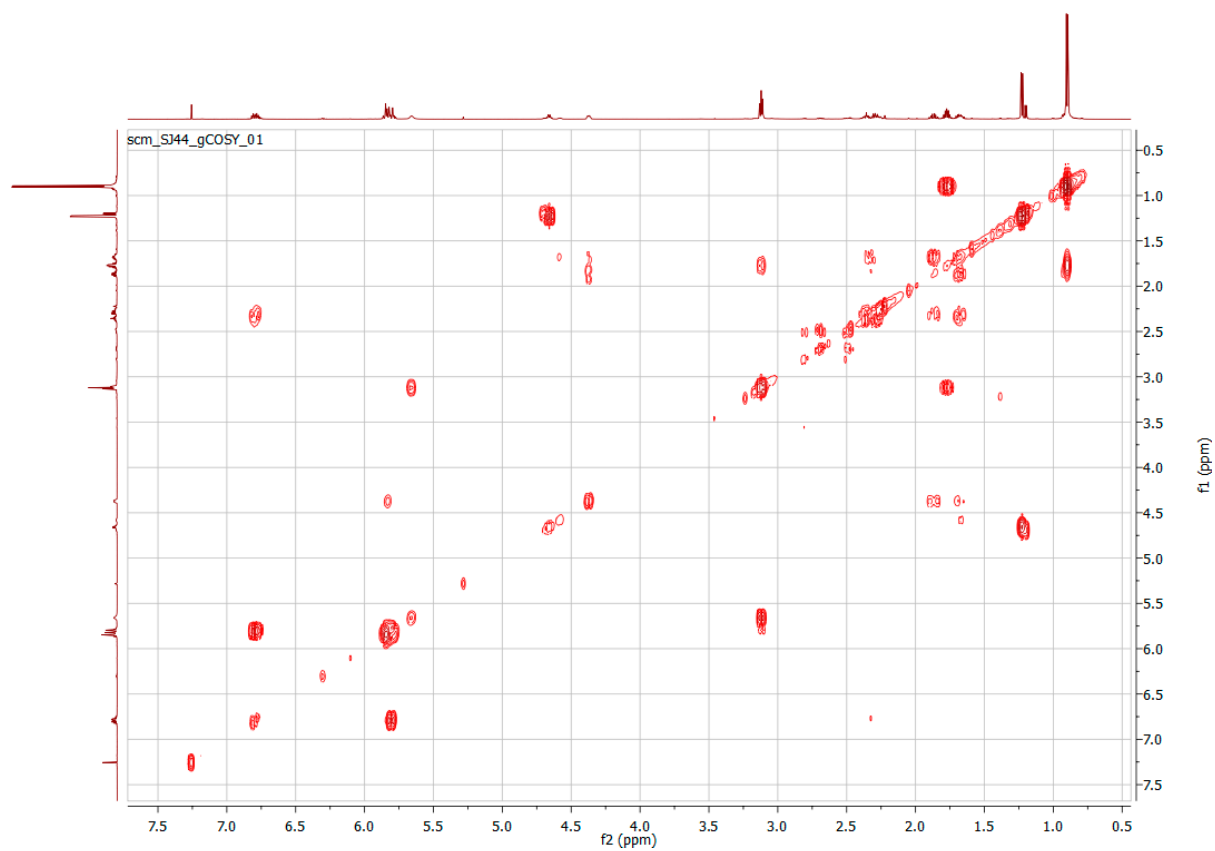

Figure S4.  $^1\text{H}/^1\text{H}$ -COSY spectrum (600 MHz,  $\text{CDCl}_3$ ) of compound 3.

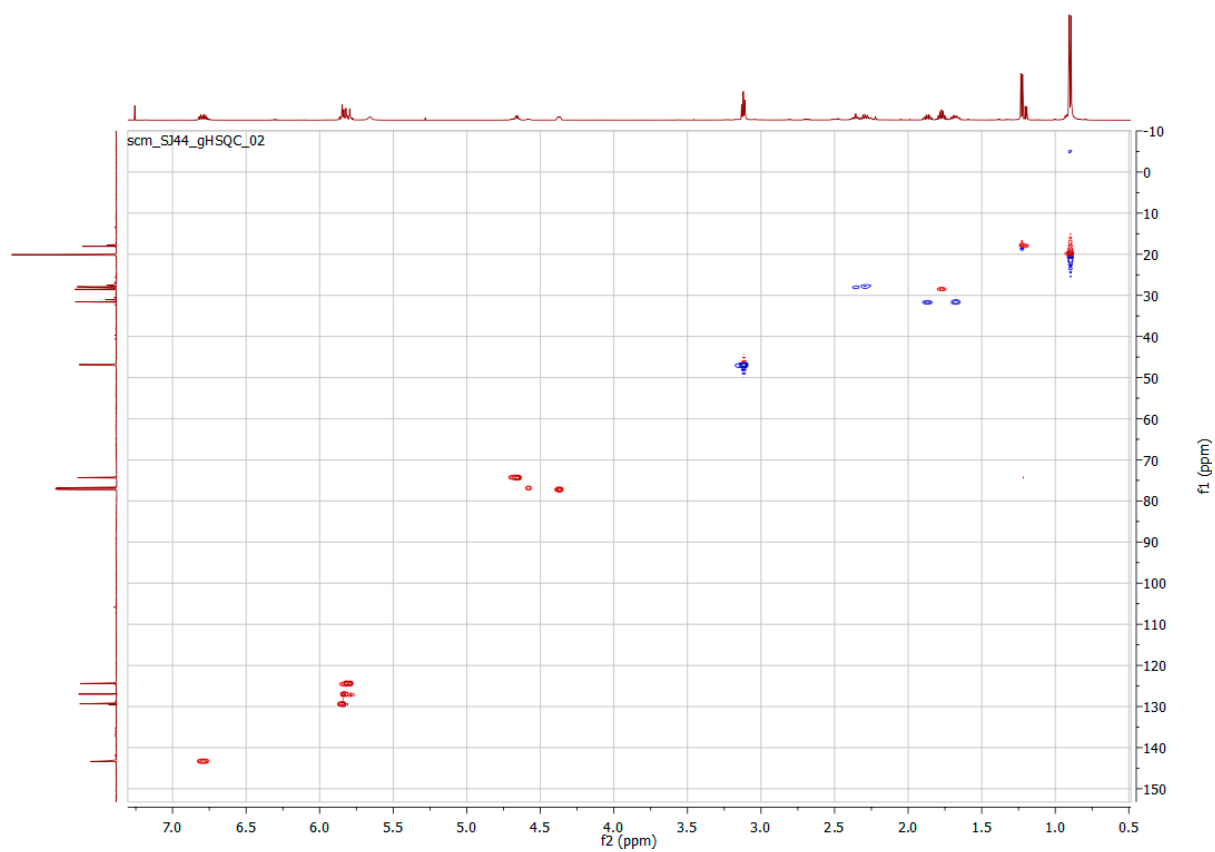

Figure S5.  $^1\text{H}/^{13}\text{C}$ -HSQC spectrum (600/150 MHz,  $\text{CDCl}_3$ ) of compound 3.

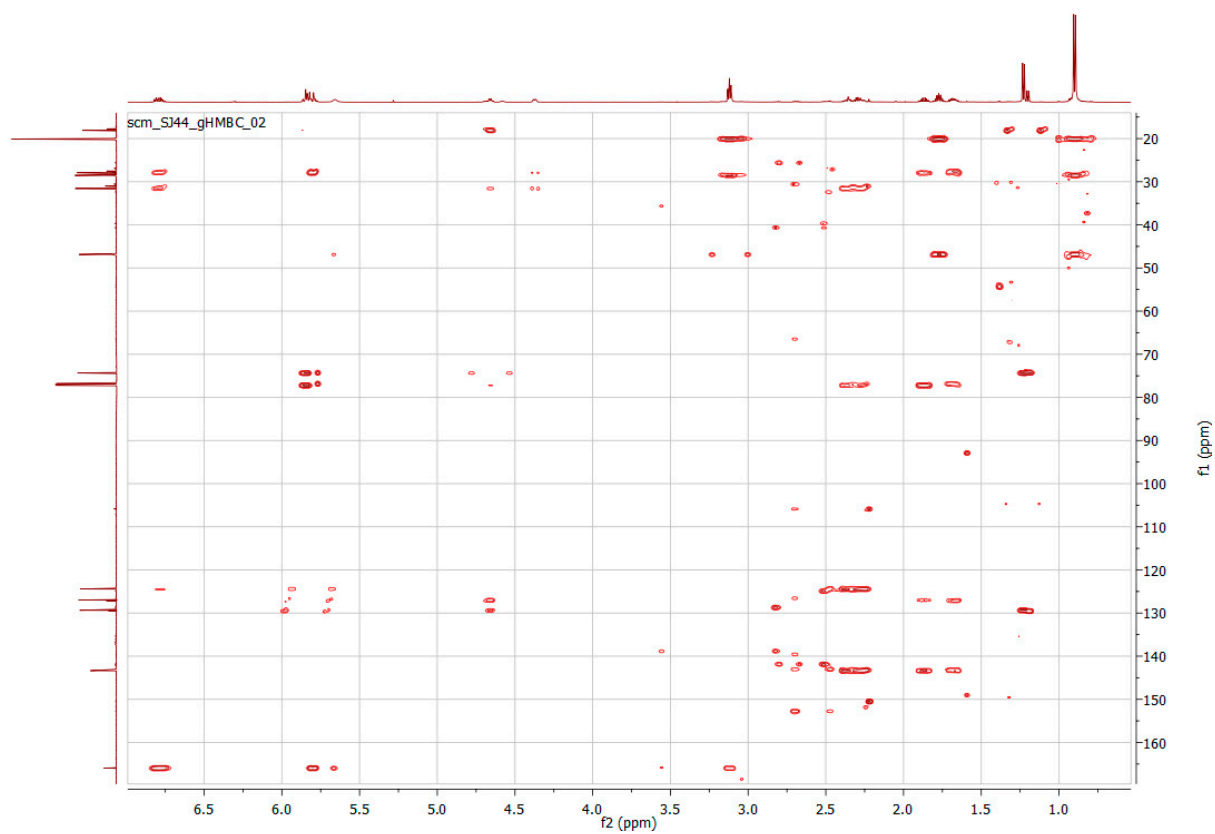

Figure S6.  $^1\text{H}/^{13}\text{C}$ -HMBC spectrum (600/150 MHz,  $\text{CDCl}_3$ ) of compound 3.

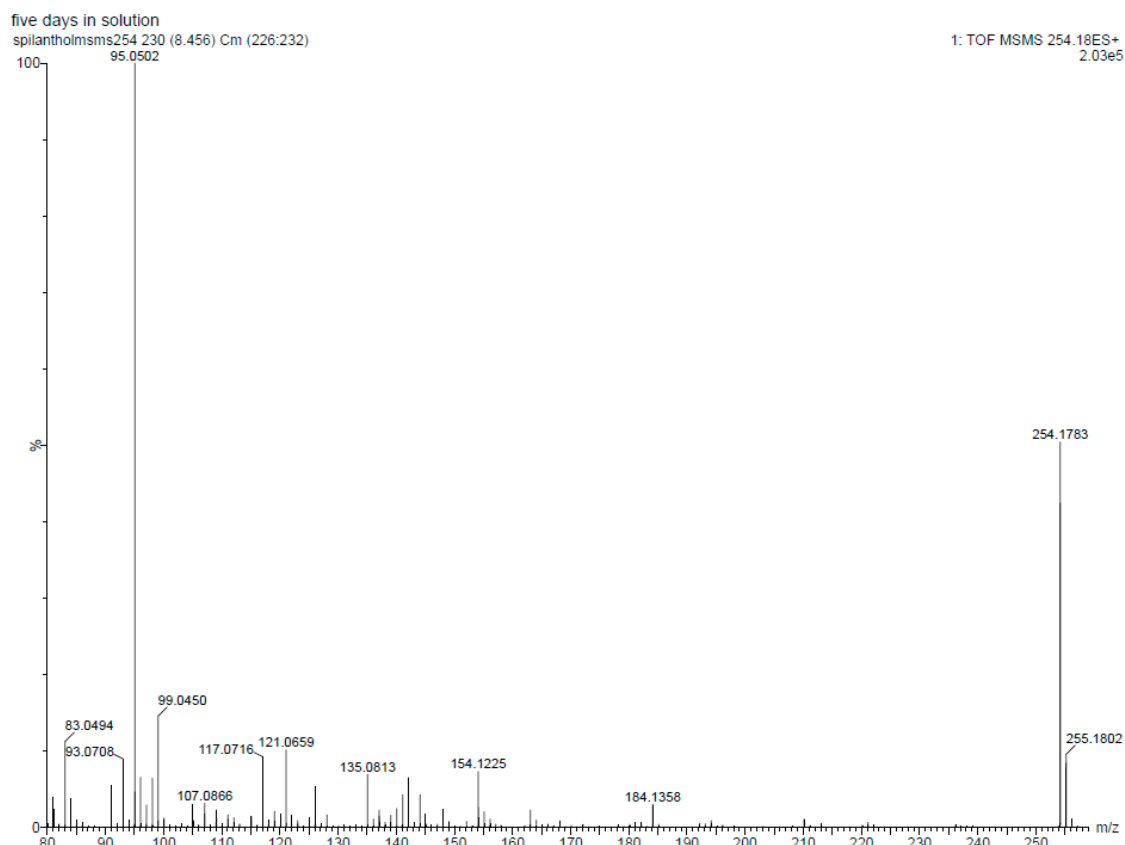

Figure S7. HR-ESI-MS/MS spectrum of the endoperoxide alkamide 3 (parent ion  $m/z$  254).

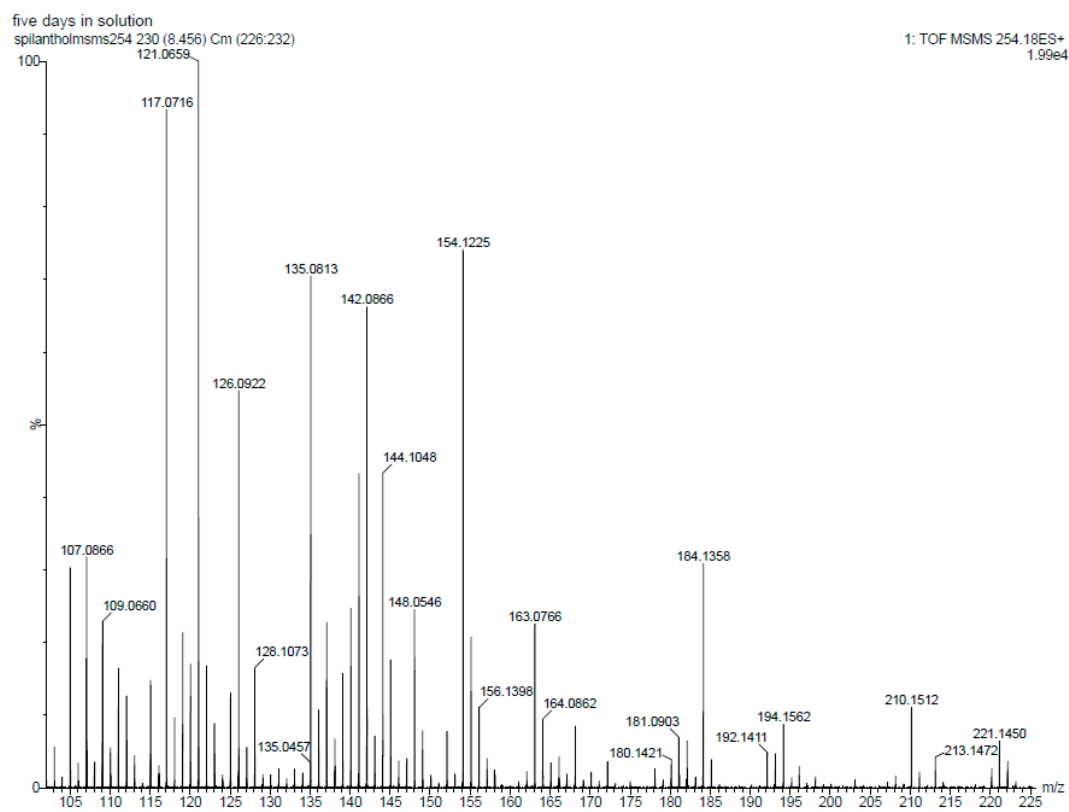

Figure S8. Magnified HR-ESI-MS/MS spectrum of the endoperoxide alkamide 3 (parent ion  $m/z$  254).

## LC-MS and LC-MS/MS Analyses

Pure compounds: Chromatographic separation and check for purity was performed on a Dionex Ultimate 3000 RS Liquid Chromatography System on a Dionex Acclaim RSLC 120, C18 column (2.1 × 100 mm, 2.2 μm) with a binary gradient (A: water with 0.1% formic acid; B: acetonitrile with 0.1% formic acid) at 0.8 mL/min: 0 to 9.5 min: linear from 5% B to 100% B; 9.5 to 12.5 min: isocratic 100% B; 12.5 to 12.6 min: linear from 100% B to 5% B; 12.6 to 15 min: isocratic 5% B. The injection volume was 2 μL. Eluted compounds were detected using a Dionex Ultimate DAD-3000 RS over a wavelength range of 200–400 nm and a Bruker Daltonics micrOTOF-QII time-of-flight mass spectrometer equipped with an Apollo electrospray ionization source in positive mode at 5 Hz over a mass range of  $m/z$  50–1,000 using the following instrument settings: nebulizer gas nitrogen, 5 bar; dry gas nitrogen, 9 L/min, 220 °C; capillary voltage 4,500 V; end plate offset −500 V; transfer time 70 μs; collision gas nitrogen; collision energy and collision RF settings were combined to each single spectrum of 1000 summations as follows: 250 summations with 20% base collision energy and 130 Vpp + 250 summations with 100% base collision energy and 500 Vpp + 250 summations with 20% base collision energy and 130 Vpp + 250 summations with 100% base collision energy and 500 Vpp. Base collision energy was 50 eV for precursor ions with a  $m/z$  less than 500 and then linearly interpolated against  $m/z$  up to a maximum of 70 eV for precursor ions with a  $m/z$  of up to 1000. Internal dataset calibration (HPC mode) was performed for each analysis using the mass spectrum of a 10 mM solution of sodium formiate in 50% isopropanol that was infused during LC re-equilibration using a divert valve equipped with a 20 μL sample loop. The sample concentration was 0.1 mg/mL in methanol.

CH<sub>3</sub>Cl<sub>3</sub>-extract: Chromatographic separation was performed on a BEH C18 column: 50 mm, 1.0 mm, particle size 1.7 μm (Waters) during 15 min. The temperature of the column and the sample tray temperature were respectively 40 °C and 20 °C. The gradient employed at flow rate of 0.3 mL/min, was 95% A (water/formic acid, 99.9/0.1 *v/v*) and 5% B (acetonitrile); 0–8 min, 60% of A; 8.1–8.5 min 40% of A; 8.5–10.9 min 10% of A; 10.9–15 min 95% of A. The injection volume of the sample was amounted to 5 μL. The analysis was recorded in ESI positive mode using the following instrument settings: nebulizer and desolvation gas: nitrogen; flow cone gas 10 L/h; flow desolvation gas 700 L/h; sampling cone 40 V; source offset 80 V; temperature cone 90 °C; temperature desolvation 200 °C; collision gas: argon; energy of collision: 25 eV; Lockspray reference sample: Leucine encephalin with the lock mass at  $m/z$  556.2771 (ESI+).
